# Supplementary material for: Extracellular Matrix Stiffness and Composition Regulate the Myofibroblast Differentiation of Vaginal Fibroblasts
Source: PubMed Central journal article supplement (PMC7369731; doi:10.3390/ijms21134762), 2020-07-04
Supplement: ijms-21-04762-s001.pdf [file ijms-21-04762-s001.pdf]

# Extracellular Matrix Stiffness and Composition Regulate the Myofibroblast Differentiation of Vaginal Fibroblasts

## Supplementary Materials

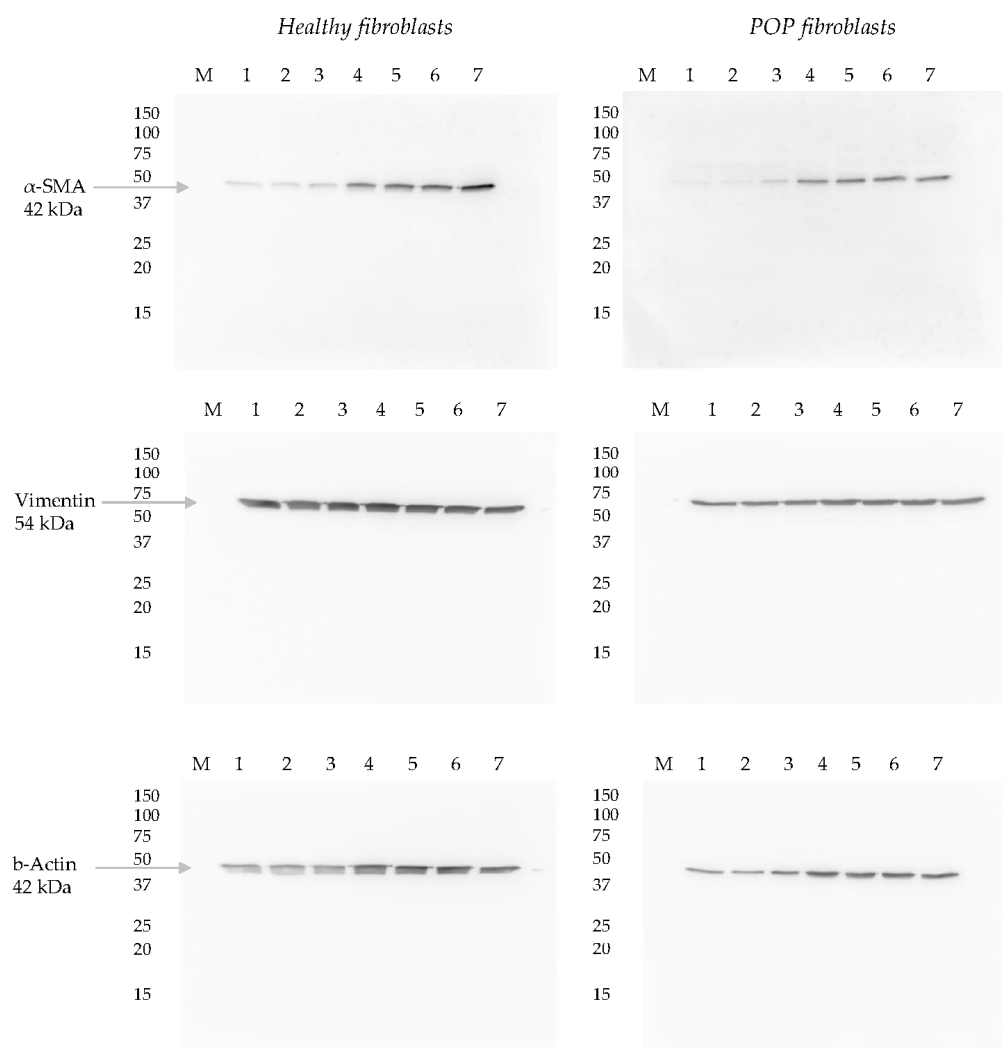

Codes used to identify the lanes:

- M = Marker
- 1 = 0,2 kPa
- 2 = 0,5 kPa
- 3 = 2 kPa
- 4 = 8 kPa
- 5 = 16 kPa
- 6 = 32 kPa
- 7 = 64 kPa

Abbreviations:  $\alpha$ -SMA: alpha-smooth muscle actin; kPa: kilo Pascals; POP: pelvic organ prolapse

**Figure S1.** Original Western Blots images corresponding to Figure 1.

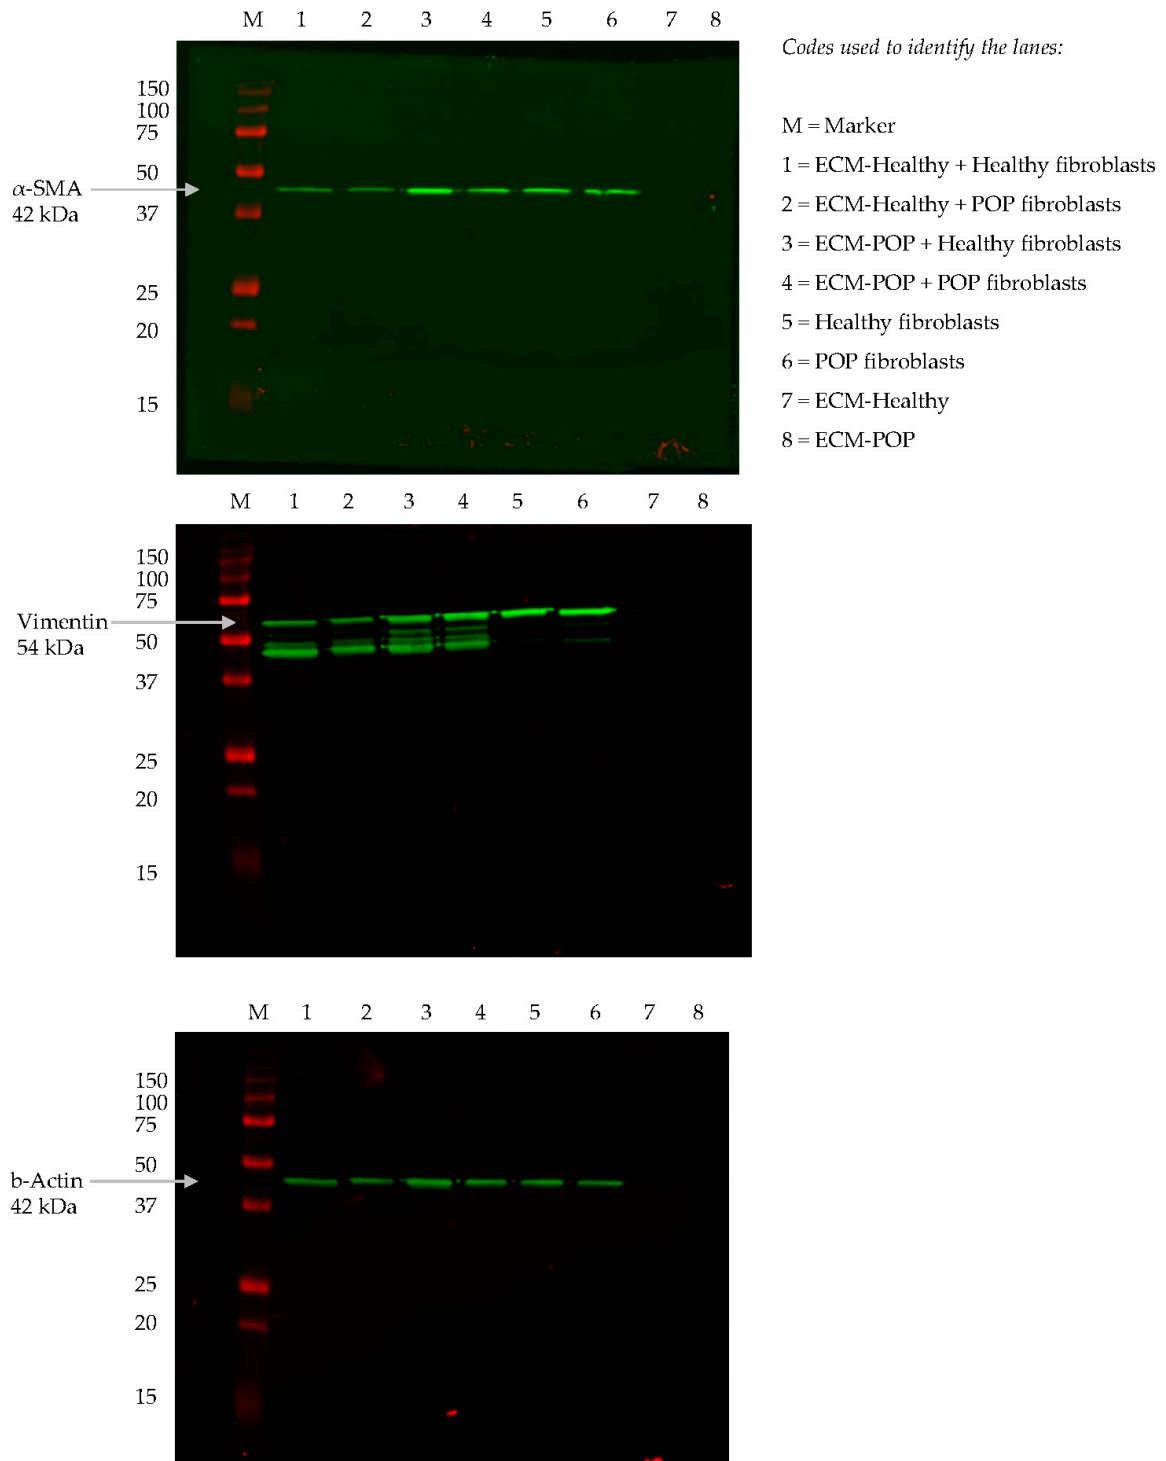

Abbreviations:  $\alpha$ -SMA: alpha-smooth muscle actin; ECM: extracellular matrix; POP: pelvic organ prolapse

**Figure S2.** Original Western Blots images corresponding to Figure 4.
